# Supplementary material for: Specific ablation of CD4+ T-cells promotes heart regeneration in juvenile mice
Source: PubMed Central journal article supplement (PMC7381734; doi:10.7150/thno.42943), 2020-06-29
Supplement: thnov10p8018s1.pdf [file thnov10p8018s1.pdf]

## Supplementary Figures

**Figure S1 Depleting efficiency of GK1.5 and YTS169 targeting CD4<sup>+</sup> and CD8<sup>+</sup> T-cells, respectively, after neonatal heart injury.** Flow cytometric analysis and quantifications showing %CD3<sup>+</sup>CD4<sup>+</sup> and %CD3<sup>+</sup>CD8<sup>+</sup> T-cells among total peripheral blood cells at (A) 7 days or (B) 4 weeks after CI of ICR mice treated with anti-CD4 (GK1.5) and anti-CD8 (YTS169) monoclonal antibodies, respectively. Data are presented as mean±S.E.M., \*\*\*P<0.001, n=6 per group.

**A**

**At day 7 after treatment**

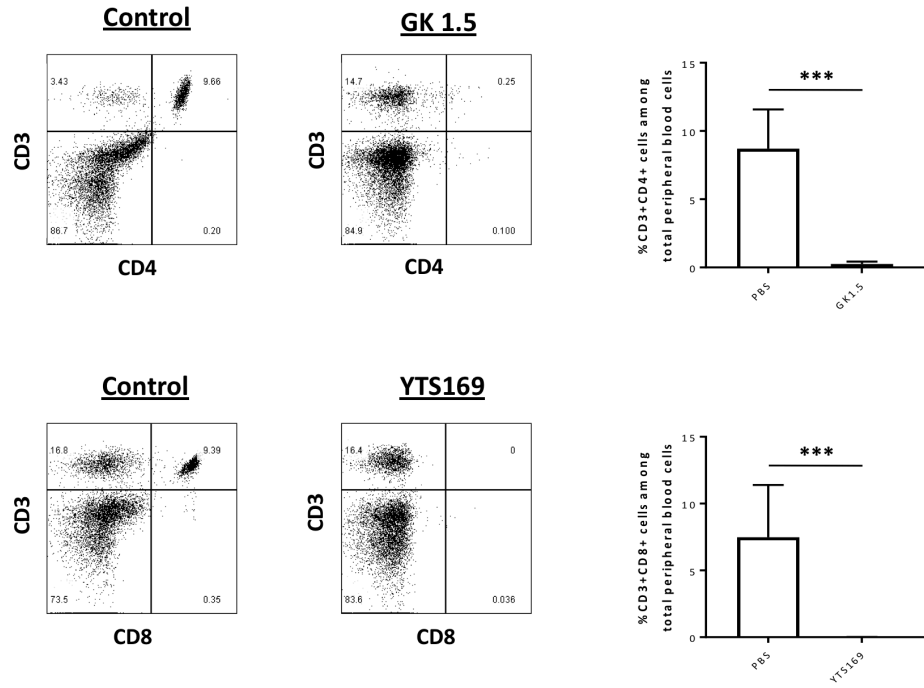

**B**

**At day 30 after treatment**

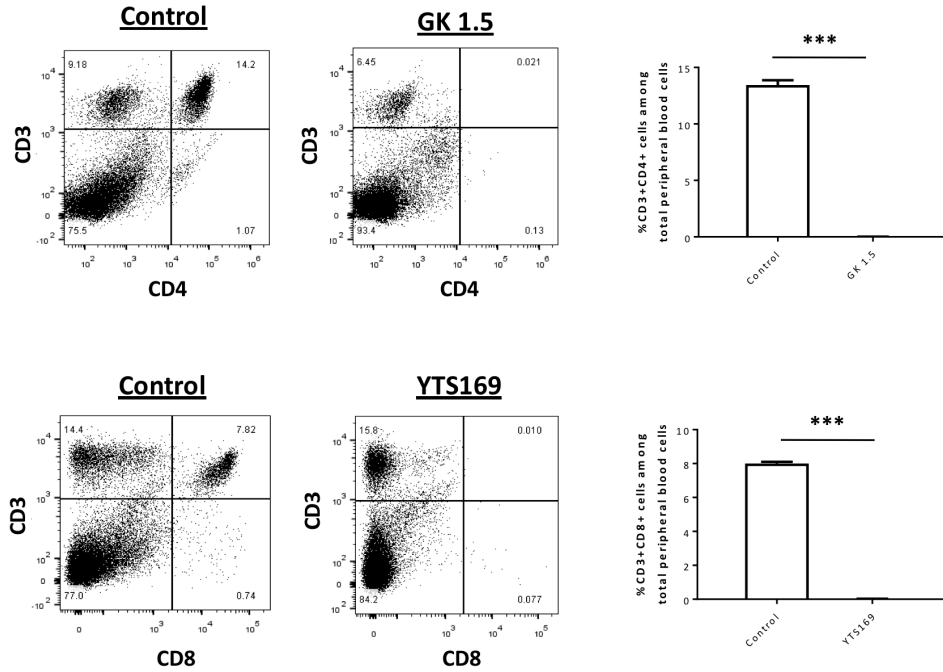

**Figure S2 Neonatal CD8<sup>+</sup> T-cells are not cytotoxic to cardiomyocytes.** Neonatal CD8<sup>+</sup> T-cells were co-cultured with neonatal cardiomyocytes at a ratio of 1:100 for 3 days. (A). Immunostaining for pH3<sup>+</sup> (green) and cTnT<sup>+</sup> (red) cells; or cCASP3<sup>+</sup> (green) and cTnT<sup>+</sup> (red) cells, scale bars: 50 μm. Arrows indicate cardiomyocytes positive for pH3 or cCASP3. (B, C) Quantification of absolute number of (B) %pH3<sup>+</sup>cTnT<sup>+</sup> or (C) %cCASP3<sup>+</sup>cTnT<sup>+</sup> cardiomyocytes among total cTnT<sup>+</sup> cardiomyocytes. Data are presented as mean±S.E.M., n = 3 independent experiments.

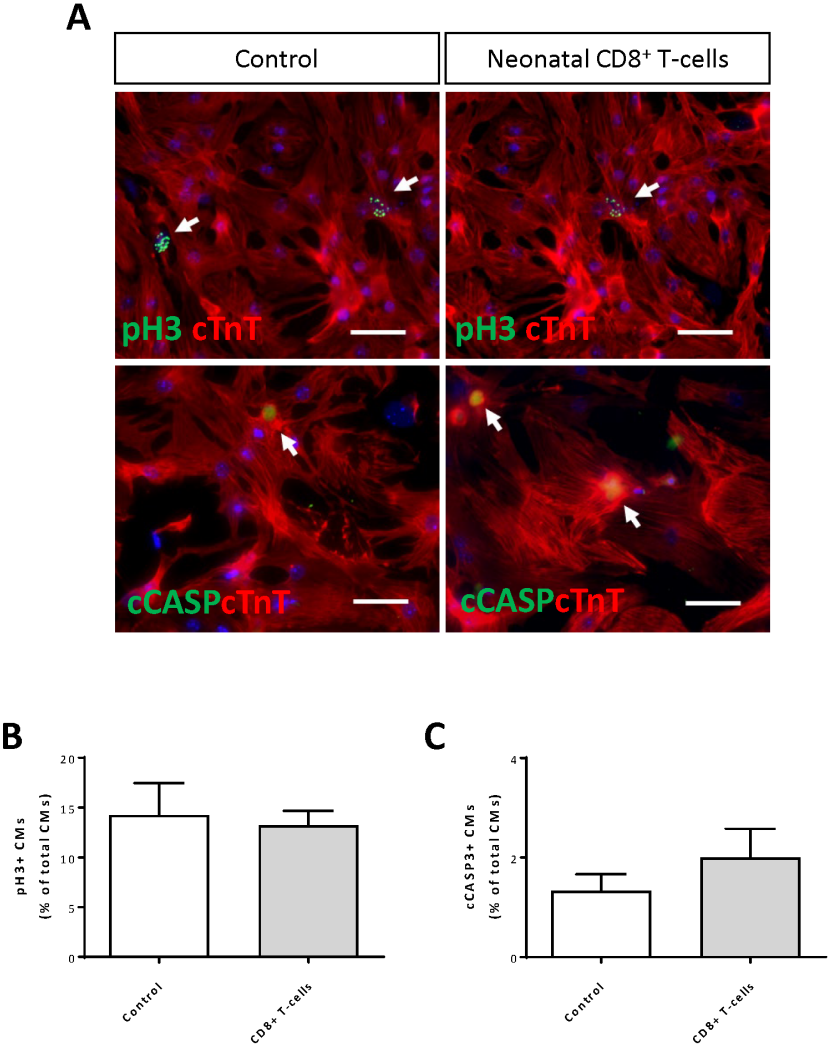

**Figure S3 *t*-SNE plots confirm the purity of purified T-cells of the neonatal hearts for single-cell transcriptomic profiling.** CD45<sup>+</sup>CD3<sup>+</sup> T-cells were purified from the hearts of ICR mice that underwent CI at P3 and P8, respectively, by flow cytometry. Most cells express the *Cd3* transcripts with signature of CD4<sup>+</sup> (*Cd4*, *Zbtb7b*) or CD8<sup>+</sup> (*Cd8a*, *Cd8b1*) T-cells.

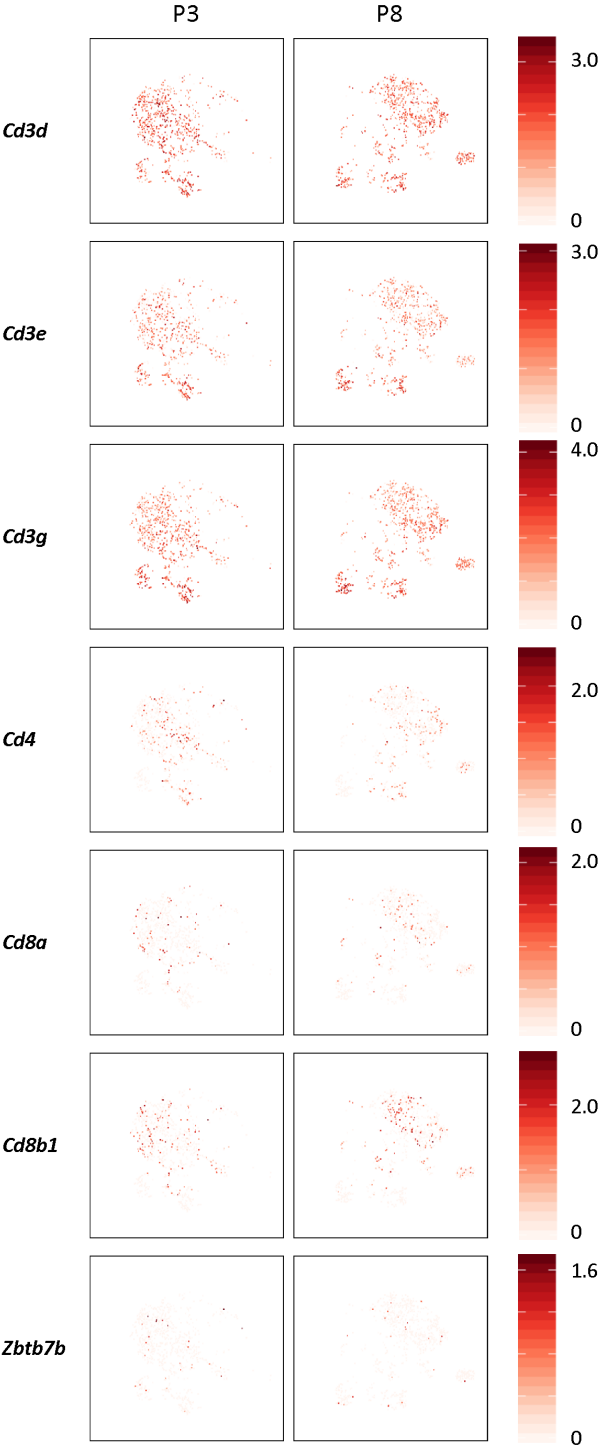

**Figure S4 *t*-SNE plots showing expression of cytotoxic genes by CD3<sup>+</sup> T-cells of the neonatal hearts after injury.** CD45<sup>+</sup>CD3<sup>+</sup> T-cells were purified from the hearts of ICR mice that underwent CI at P3 and P8, respectively, by flow cytometry. *Gzmb* was the predominantly expressed cytotoxic gene in cells of S3. Although few cells displayed cytotoxicity, more cells of the P8 than P3 hearts expressed these cytotoxic genes.

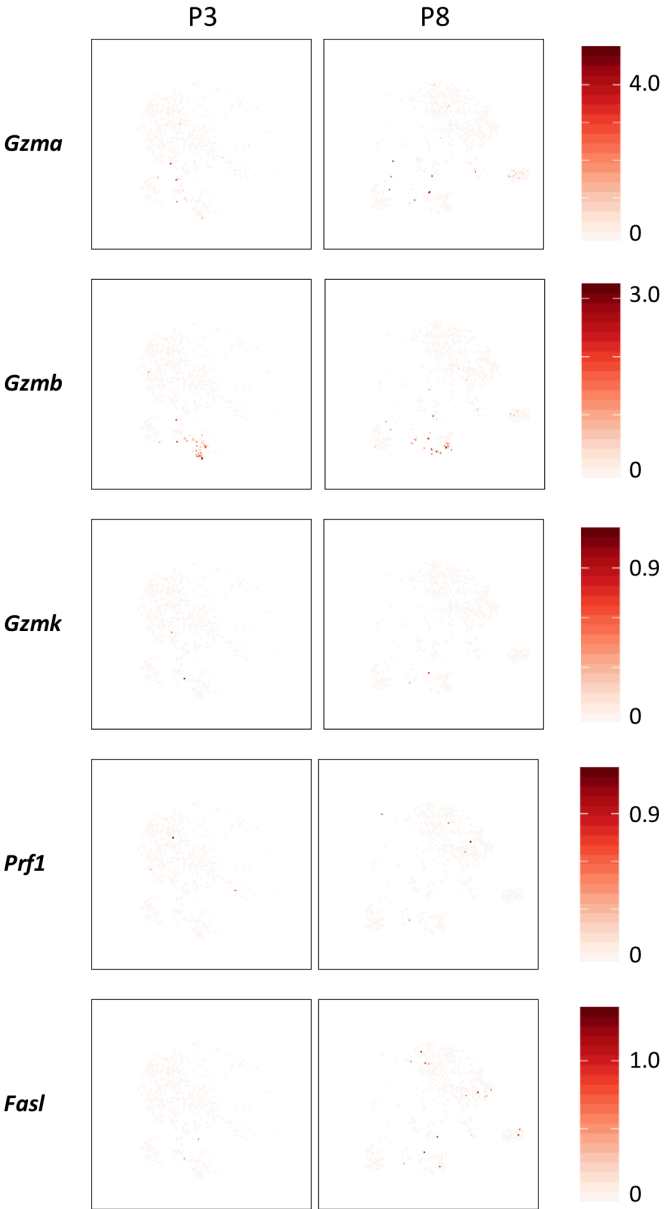

**Figure S5 *t*-SNE plots showing expression of memory cell associated genes by CD3<sup>+</sup> T-cells of the neonatal hearts after injury.** CD45<sup>+</sup>CD3<sup>+</sup> T-cells were purified from the hearts of ICR mice that underwent CI at P3 and P8, respectively, by flow cytometry.

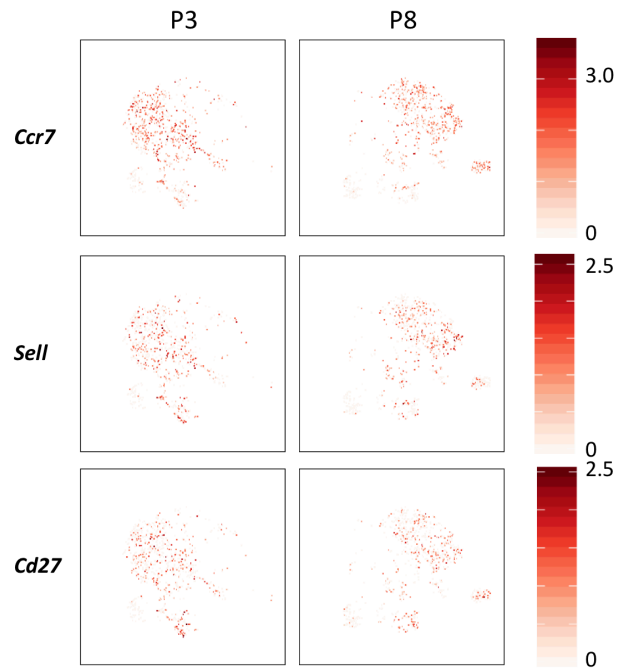

**Figure S6 *t*-SNE plots showing expression of genes specific for various T-cell subsets of the neonatal hearts after injury.** CD45<sup>+</sup>CD3<sup>+</sup> T-cells were purified from the hearts of ICR mice that underwent CI at P3 and P8, respectively, by flow cytometry. (A) Genes are specific for Treg; (B) for Th17; (C) for Th1 and (D) for Th2 cells.

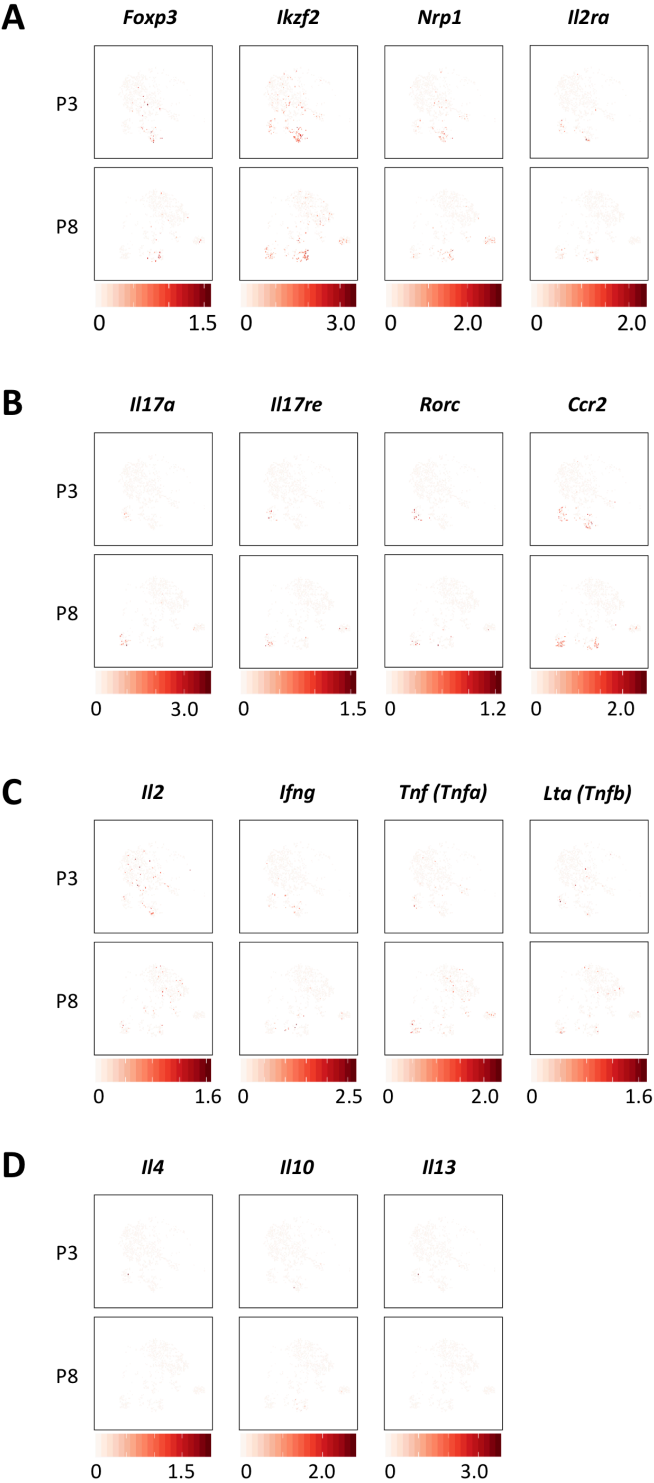

**Fig S7 Cytokines of Th1 and Th17 cells are cytotoxic to neonatal cardiomyocytes.** (A) Immunocytochemistry for cTnT<sup>+</sup> (green) and TUNEL<sup>+</sup> (red) cells showing cell death of neonatal cardiomyocytes after cultured with PBS (solvent control), 50 ng/ml TNF- $\alpha$ , 50 ng/ml IFN- $\gamma$  or 100 ng/ml IL-17A for 1 day, scale bars: 50  $\mu$ m. White arrows indicate apoptotic TUNEL<sup>+</sup>cTnT<sup>+</sup> cells; and squares showing enlarged nuclei positive for TUNEL. (B) Quantification of (A) showing %TUNEL<sup>+</sup>cTnT<sup>+</sup> cardiomyocytes among total cTnT<sup>+</sup> cardiomyocytes. Data are presented as mean $\pm$ S.E.M., n = 3 independent experiments with a total of ~20,000 cardiomyocytes counted, \*P<0.05, \*\*P<0.01.

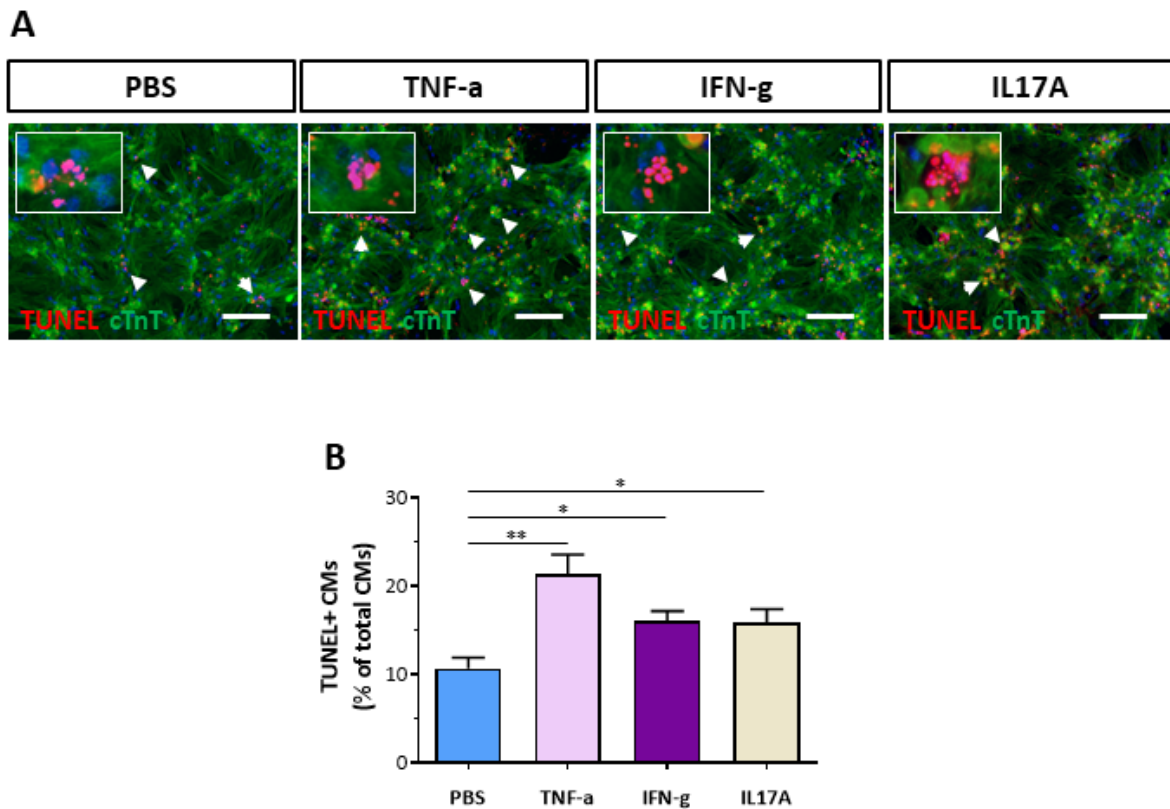



## Supplementary Tables

**Table S1 A list of subset-specific genes as identified by *t*-SNE analysis.**

| Clusters  | Genes                                                                                                                                                                                                                                                                                                                                                                                                                                                                                                                                                                                                                                                                                                                                                                                                                                                                                                                                                                                                                                                                                                                                                                                                                                                                                                                                                                                                                                                                                                                                                                                                                                                                                                                                                                                                                               |
|-----------|-------------------------------------------------------------------------------------------------------------------------------------------------------------------------------------------------------------------------------------------------------------------------------------------------------------------------------------------------------------------------------------------------------------------------------------------------------------------------------------------------------------------------------------------------------------------------------------------------------------------------------------------------------------------------------------------------------------------------------------------------------------------------------------------------------------------------------------------------------------------------------------------------------------------------------------------------------------------------------------------------------------------------------------------------------------------------------------------------------------------------------------------------------------------------------------------------------------------------------------------------------------------------------------------------------------------------------------------------------------------------------------------------------------------------------------------------------------------------------------------------------------------------------------------------------------------------------------------------------------------------------------------------------------------------------------------------------------------------------------------------------------------------------------------------------------------------------------|
| <b>S1</b> | Dapl1, Satb1, Tdrp, Cd8b1, Igfbp4, Lef1, Pik3ip1, Ntrk3, Slfn1, Tcf7, Bach2, Tubb2a, Ccr7, Cd55, Bcl2, Foxp1, Cd8a, Tmem108, Gm8369, Rab3ip, Dusp10, Atp1b1, Klhdc2, Themis, Ssbp2, Itm2a, Actn1, Sidt1, Ubxn11, Ibtkt, Pptc7, RP23-6I17.1, Trem12, Ttc3, Dgka, Enc1, Txk, Klhdc1, Il6ra, Smchd1, Fam101b, Map7, Cdkn2aip, Gm12840, Ssh2, Rasgrp2, 4932422M17Rik, Dtx1                                                                                                                                                                                                                                                                                                                                                                                                                                                                                                                                                                                                                                                                                                                                                                                                                                                                                                                                                                                                                                                                                                                                                                                                                                                                                                                                                                                                                                                              |
| <b>S2</b> | Klrg1, Gzmb, Ctla4, AW112010, Il1r11, Tnfrsf4, Ikzf2, Itgb1, Icos, Sdcbp2, Samsn1, S100a6, Hopx, Gna15, S100a11, S100a4, Glrx, Pglyrp1, Foxp3, Tnfrsf18, Rgs1, Nrpl, Rgs16, Ass1, S100a10, Tnfrsf9, Sh3bgr1, Rora, Crip1, Capg, Egl3, Lgals1, Vim, Cmtm7, Acot7, Lgals3, Prr13, Atxn1, Sla, Ifi2712a, Stx11, Cd48, Cxcr3, Gbp3, Slc25a19, Il2ra, Cd83, Ccr2, Actg1, Ppil1, Socs2, Traf1, Ebp, Hilpda, Osbpl3, Pmaip1, Mif4gd, Matk, Gm2a, Gimap7, Slc4a7, Izumo1r, Pkp3, Dusp4, Ifng, Cd200r1, Slc16a3, 2010111I01Rik, Tnfrsf1b, Tstd3, Dnajc15, Phf11b, Impa2, Lamtor5, Il2rb, Cd274, Atp2b4, Serinc3, Itgav, Myo1f, Pear1, Agpat4, Epsti1, Fgl2, Psen2, Plekhh2, Fam129a, Gbp7, Acadl, Tmem173, Coro2a, Mthfsl, Map2k3, Clnd1, Rln3, Ahnak, Lmna, Ubash3b, Maf, Adora2a, Pqlc3, 1500009L16Rik, Batf, Anxa2, Raph1, Peak1, Eeal, Bcl2a1b, Reep5, Vamp8, Tank, Sytl1, Pycard, Trp53i11, Srgn, Etfb, Rab8b, Lsp1, Nfil3, Rom1, Fuca2, Vmp1, Crem, Slc22a15, Gem, Alad, Aim2, Mmd, Itgb7, Rab19, Myadm, Tgif1, BC021614, Ebpl, Rhoc, Snrnp25, Oaz2, Arl13b, Icam1, Tkt, Glmp, Smpd13a, Mdh1, Sar1b, Vps54, Arl5a, Plp2, Tnfaip8, Capn2, Snx2, Cd5, Ndrgr1, Gliplr1, Lcp1, Plin2, Fkbp1a, S100a13, Ncf4, AU020206, Gpr68, Blmh, Dhrr7, Smap1, Bcl2a1d, Ly6e, Ifrd1, Mir155hg, Ptpcap, Snx18, Smco4, Hcls1, Mien1, Sytl2, Tagln2, Dnaaf5, Rilpl2, Pla2g16, Abracl, Dok2, Ccl5, Isg20, Tpi1, Atp2b1, Ctsa, Pef1, Cyb5a, Cdc42, Ift52, Ccdc69, Nfkb1, Cbr4, Csrp2, Cpm, Cd6, Nkg7, Sdhaf2, Ybx3, Cap1, Sh2d1a, Unc119, Smim24, Ndufb7, Dgcr6, Mrpl40, Lpxn, H2afz, Itm2b, Ubl3, Faim, Ccrl2, Etaa1os, Cox17, Actb, Dok1, Zc3h12d, Ube2l3, Mpc1, Cmpk1, Ikzf3, Syng2, Prdx4, Pim1, Acsbg1, Ptpn7, Tspo, Ppp1ca, Pigs, Dpp3, H2-D1, Hsd11b1, Arid3a, Mrpl54, Bhlhe40, Cd2, Arpc5, Gyg, Prelid1, Trpv2, Crlf2, Rpap3, Lamtor4, Crip2, Ptger4 |
| <b>S3</b> | Cd16311, Cxcr6, Tmem176a, Ly6g5b, Blk, Kcnk1, Serpinb1a, Tmem176b, Ltb4r1, 5430421N21Rik, Il1r1, Abi3bp, Tns4, Ccr2, S100a4, Il17re, Slc6a13, S100a6, Podnl1, Hbegf, Rorc, F2r, Il18r1, Bcl2a1d, Aqp3, Zbtb16, St6galnac3, Avpi1, Il17a, Tnfsf14, Maf, Cd82, Bcl2a1b, Lgals3, Fgl2, Bhlhe40, Hk2, Cd44, Ramp1, Capg, Sept11, Klrk1, Pcdcd1, Il12rb1, St3gal6, S100a11, Atp2b4, Rora, Rgs1, Sox13, Adgrg5, Bcl2a1a, Acsbg1, Slc16a6, Gm1673, 1500009L16Rik, Myo1e, Tnf, Tasp1, Ckb, Amical, Acot7, Lxn, Ramp3, Lmo4, Ly6e, Scape1, Gpr183, Fam129a, Id2, Naga, Znrd1, Mgat4a, Lgals1, Fam110a, Furin, Mdfic, Tppp3, Comt, Ahnak, Gabbr1, Cish, Mycn, Socs2, Sptssa, Cdkn1a, Rnase4, Osbpl3, Nebl, Sdf2l1, Gm29243, Tnfaip8, Antxr2, Sdccag8, Zfp3611, Sec11c,                                                                                                                                                                                                                                                                                                                                                                                                                                                                                                                                                                                                                                                                                                                                                                                                                                                                                                                                                                                                                                                                        |

|           |                                                                                                                                                                                                                                                                                                                                                                                                                                                                                                                                                                                                                                                                                                                                                                                                                                                                                                                                |
|-----------|--------------------------------------------------------------------------------------------------------------------------------------------------------------------------------------------------------------------------------------------------------------------------------------------------------------------------------------------------------------------------------------------------------------------------------------------------------------------------------------------------------------------------------------------------------------------------------------------------------------------------------------------------------------------------------------------------------------------------------------------------------------------------------------------------------------------------------------------------------------------------------------------------------------------------------|
|           | Hnrnp11, Cst7, Plekho2, Lax1, Hilpda, Prr13, Mgat5, Znrf1, Lta, Irf5, Prelid2, Fam213a, Gng2, Plxnd1, Sdc4, Ikzf3, Xlr4c, Eif4ebp1, Il2ra, Rnh1, Cd226, Adam8, Cd247, Unc119, Anxa1, Smox, Emp1, Abi3, Zap70, Wbp1, Anxa2, Wls, Eml2, Nav2, Mfsd10, Fnbp1, Abhd16a, Il18rap, Gramd1b, Dnaja4, Smpdl3a, Zyx, Serpinb6a, Cxcr3, Cit, Cd164, Xlr4a, Nedd4, Fosb, Cers4, Nucb1, Dap, Gpatch2, Rarg, Pdia6, Cmtm7, Ppp1r11, Rrad, Igflr, Lgals3bp, S100a10, Ncf4, Diaph1, Tagln2, Fkbp2, Rinl, D16Erd472e, Laptm4b, Pi4k2a, Psap, Eif4e3, Nabp1, Gch1, Ccdc50, Ppp3ca, Clcn3                                                                                                                                                                                                                                                                                                                                                        |
| <b>S4</b> | S100a8, Fabp4, Sparc, Mgp, S100a9, Dcn, Lum, Eln, Gsn, Mfap4, Mfap5, BC100530, Rbp7, Gng11, Col3a1, Colla1, Egfl7, Tm4sf1, Colla2, Cd36, Lpl, Asp, Gm5483, Bgn, Gpihbp1, Cxcl12, Ly6c1, Cav1, Col4a2, Sparcl1, Ltbp4, Crip2, Rarres2, Cd34, Sdpr, Lyl1, Dpt, Pam, Mgl1, Myl9, Fstl1, Pmp22, Nenf, Myct1, Fabp5, Ifitm3, Pcolce, Hspg2, Ppic, Selm, S100a16, Gpx7, Tcf4, Cald1, Rgs5, Ifitm2, Gpx3, Ccl9, Serpinh1, Anxa3, Col4a1, Lhfp, Pid1, Csrp2, Cnn3, Cd63, Cd81, H2-Ab1, Ccl7, Plk2, Erdr1, Hspb1, Cdh5, Spry2, Esam, Pkig, Mmp2, Id1, Rhoc, Ptn, Pi16, Fn1, Cst3, Cyr61, Dusp3, Ier3, Bmpr2, Hmox1                                                                                                                                                                                                                                                                                                                      |
| <b>S5</b> | Lyz2, Apoe, Pf4, C1qa, Fcer1g, Tyrobp, C1qb, C1qc, Hpgd, Dab2, Fcgr3, Mef2c, Cxcl16, Cx3cr1, Gatm, Csf1r, Pla2g7, Aif1, F13a1, Spi1, Cd63, Wfdc17, Mt1, Zeb2, Cst3, Cd14, Alox5ap, Trf, Ctsh, Lst1, Lyn, Cd68, Clec4n, Ccl2, Mrc1, Ferls, C5ar1, Cbr2, Ifitm2, Unc93b1, Pld4, Cxcl2, Clec4a2, Lgmn, Blvrb, Ccl6, Cybb, Ly86, Slc40a1, Grn, Adgre1, Sirpa, Ifitm3, Ltc4s, Igf1, Ccl12, Camk1, Lilrb4a, Stab1, Ctsb, Hpgds, Hmox1, Ms4a7, Ehd4, Ctsz, Ctsc, Gas7, Lepr, Marcks, Ms4a6d, Hexa, Ms4a6c, Skap2, Asah1, Ctss, Rnpep, Sepp1, Atf3, S100a1, Abhd12, Plek, Cd86, Dhrr3, App, Tpd52, Fcgrt, Marcksl1, Ccrl2, Rnase4, Il1b, Ccl4, Pltp, Efhd2, Hebpl, Ccl3, Sh2b3, Ccnd1, Pid1, Cd83, Ier3, Ccl9, Ccl7, Lamp2, Pmp22, Dusp3, Ralb, Lamp1, Cxcl10, Ifi30, Ckb, Cxcl1, Soat1, Apobec1, Plin2, H2-DMA, Pkig, Hexb, Ncf1, Atp6v1a, Tm6sf1, Nfic, Cd74, Irf5, Tctex1d2, Ftl1, Slc25a10, Plac8, Cyr61, Gstm1, Anxa5, Irf8, Cd81 |
| <b>S6</b> | 2810417H13Rik, Top2a, Stmn1, Asf1b, Birc5, Rrm2, Ube2c, Cks1b, Cdca3, Mki67, Tuba1b, Ccnb2, Smc2, Incenp, Tyms, Fbxo5, Tacc3, Cenpm, Cdca8, Spc24, Nusap1, Cenpf, Aurka, Prc1, Mad211, Ccdc34, Hmgb2, Hmnr, Cenpe, Lockd, Mcm5, Pttg1, Tubb5, Knstrn, Pmf1, Hmgn2, Cdc20, Lig1, Racgap1, Cenpw, Lmnb1, Nrm, H2afx, Orc6, Mcm3, Arhgap11a, Tipin, Cenpa, Prim1, Dut, Ncapd2, H2afv, Hells, G2e3, Syce2, Kif20b, Cdc25b, Cdca7, Dhfr, Cks2, Hmgb1, Tuba1c, 2700094K13Rik, Cmc2, H2afz, Dlgap5, Mcm6, Kif22, Rrm1, Rfc2, 4930579G24Rik, Ranbp1, H1f0, Ezh2, Lsm2, Gmnn, Cit, Hist1h2bc, Banf1, Haus1, Tmpo, Prim2, Nap111, Tmem43, Txn1, Ska2, Anxa2, Nutf2-ps1, Ptma, Usp1                                                                                                                                                                                                                                                       |

**Table S2 GO enrichment analysis showing the selected, most significant biological processes in cells of each subset of the CD3<sup>+</sup> T-cells purified from the regenerating and non-regenerating neonatal heart, respectively, after injury.**

| <b>Clusters</b> | <b>P value</b> | <b>GO Term</b>                                                | <b>Genes</b>                                                                                                                                               |
|-----------------|----------------|---------------------------------------------------------------|------------------------------------------------------------------------------------------------------------------------------------------------------------|
| <b>S1</b>       | 0.002434485    | GO:0042110~T cell activation                                  | Satb1, Cd8a, Trem12                                                                                                                                        |
|                 | 0.003251498    | GO:0006470~protein dephosphorylation                          | Bcl2, Ssh2, Dusp10, Pptc7                                                                                                                                  |
|                 | 0.003318299    | GO:0002250~adaptive immune response                           | Cd8b1, Cd8a, Themis, Txk                                                                                                                                   |
| <b>S2</b>       | 1.22E-05       | GO:0006915~apoptotic process                                  | Traf1, Trpv2, Lgals1, Pim1, Pglyrp1, Egln3, Nfkb1, Gzmb, Pmaip1, Mien1, Aim2, Lsp1, Prelid1, Tnfrsf9, Tmem173, Tnfaip8, Ifng, Pycard, Tnfrsf18, Faim, Srgn |
|                 | 7.07E-05       | GO:0050728~negative regulation of inflammatory response       | Tnfrsf1b, Il2ra, Ptger4, Adora2a, Pglyrp1, Nfkb1, Rora, Foxp3                                                                                              |
|                 | 6.43E-04       | GO:0050710~negative regulation of cytokine secretion          | Ptger4, Foxp3, Tnfrsf4, Srgn                                                                                                                               |
| <b>S3</b>       | 5.91E-06       | GO:0032729~positive regulation of interferon-gamma production | Il18r1, Il12rb1, Tnf, Ccr2, Klrk1, Cd226, Lta                                                                                                              |
|                 | 5.09E-05       | GO:0006954~inflammatory response                              | Tnf, Lxn, Anxa1, Il17re, Cxcr3, Il17a, Ltb4r1, Cxcr6, Ccr2, Zap70, Adam8, Lta, F2r                                                                         |
|                 | 2.99E-04       | GO:0019221~cytokine-mediated signaling pathway                | Il1r1, Podnl1, Irf5, Socs2, Cd44, Ccr2, Il17re, Cish                                                                                                       |
| <b>S4</b>       | 8.13E-07       | GO:0030199~collagen fibril organization                       | Lum, Col3a1, Colla2, Colla1, Serpinh1, Dpt                                                                                                                 |
|                 | 3.98E-06       | GO:0042060~wound healing                                      | Cav1, S100a8, Col3a1, Colla1, Sparc, Dcn, Fn1                                                                                                              |
|                 | 1.39E-05       | GO:0043206~extracellular fibril organization                  | Col3a1, Cst3, Mfap4, Mfap5                                                                                                                                 |
| <b>S5</b>       | 2.60E-15       | GO:0006935~chemotaxis                                         | Ccl3, Ccl2, C5ar1, Lyn, Cxcl2, Ccl9, Pf4, Ccl4, Ccl7, Ccl6, Cxcl10, Ccr12, Ccl12, Cxcl16, Cx3cr1, Cyr61                                                    |
|                 | 3.61E-14       | GO:0030593~neutrophil chemotaxis                              | Cxcl1, Ccl3, Ccl2, C5ar1, Cxcl2, Ccl9, Ccl4, Ccl7, Ccl6, Fcgr3, Ccl12, Fcer1g, Il1b                                                                        |

|           |          |                                                 |                                                                                                                                                                                                                                                                              |
|-----------|----------|-------------------------------------------------|------------------------------------------------------------------------------------------------------------------------------------------------------------------------------------------------------------------------------------------------------------------------------|
|           | 3.31E-12 | GO:0070098~chemokine-mediated signaling pathway | Cxcl1, Ccl12, Ccl3, Ccl2, Cxcl2, Ccl9, Pf4, Ccl4, Ccl7, Ccl6, Cxcl10                                                                                                                                                                                                         |
| <b>S6</b> | 1.20E-34 | GO:0007049~cell cycle                           | Cks1b, Pre1, Haus1, Tipin, Aurka, Pttg1, Spc24, Cdca8, Incenp, Fbxo5, Ska2, H2afx, Hells, Cdca3, Mki67, Gmn, Lig1, Dlgap5, Nusap1, Syce2, Cenpe, Cdc20, Birc5, Pmf1, Racgap1, Knstrn, Mcm3, Ube2c, Smc2, Mcm5, Mcm6, Cdc25b, Ncapd2, Ccnb2, Mad211, Kif20b, Cks2, Cenpw, Cit |
|           | 2.38E-26 | GO:0007067~mitotic nuclear division             | Cks1b, Pre1, Haus1, Tipin, Aurka, Pttg1, Spc24, Cdca8, Incenp, Fbxo5, Ska2, H2afx, Hells, Cdca3, Mki67, Gmn, Lig1, Dlgap5, Nusap1, Syce2, Cenpe, Cdc20, Birc5, Pmf1, Racgap1, Knstrn, Mcm3, Ube2c, Smc2, Mcm5, Mcm6, Cdc25b, Ncapd2, Ccnb2, Mad211, Kif20b, Cks2, Cenpw, Cit |
|           | 1.61E-10 | GO:0006260~DNA replication                      | Prim1, Rfc2, Lig1, Rrm2, Prim2, Rrm1, Orc6, Mcm3, 2810417h13rik, Mcm5, Mcm6                                                                                                                                                                                                  |
